# Supplementary material for: Effect of Cu2+ on the nucleation kinetics and crystallization of rod-shaped CaSO4·2H2O in aqueous solution
Source: Royal Society of Chemistry journal article supplement (doi:10.1039/c9ra07640a), 2019-01-01
Supplement: c9ra07640a1.pdf [file c9ra07640a1.pdf]

## Support Information for

### Effect of $\text{Cu}^{2+}$ on the Nucleation Kinetics and Crystallization of rod-shaped $\text{CaSO}_4 \cdot 2\text{H}_2\text{O}$ in aqueous solution

Xiangbin Suna, Xianshun Wang<sup>a</sup>, Genlei Zhang<sup>\*, a, b, c</sup>, Peng Cui<sup>\*, a</sup>, Hao Shen<sup>c</sup>

<sup>a</sup>School of Chemistry and Chemical Engineering, Anhui Province Key Laboratory of Controllable Chemistry Reaction and Material Chemical Engineering, Hefei University of Technology, Tunxi Road 193, Hefei 230009, PR China

<sup>b</sup>School of Materials Science and Engineering, Hefei University of Technology, Tunxi Road 193, Hefei 230009, PR China

<sup>c</sup>Anhui Liuguo Chemical Co. Ltd, Tongling 244021, China.

\* Corresponding Author

E-mail: [genleizhang@hfut.edu.cn](mailto:genleizhang@hfut.edu.cn) (Mr. Zhang).

[cuipeng@hfut.edu.cn](mailto:cuipeng@hfut.edu.cn) (Mr. Cui).

Number of pages: 3

Number of figures: 2

**Note:** The figures, tables and text in this Supporting Information document are presented in the order in which they are referenced in the main paper.

## Supporting Figures

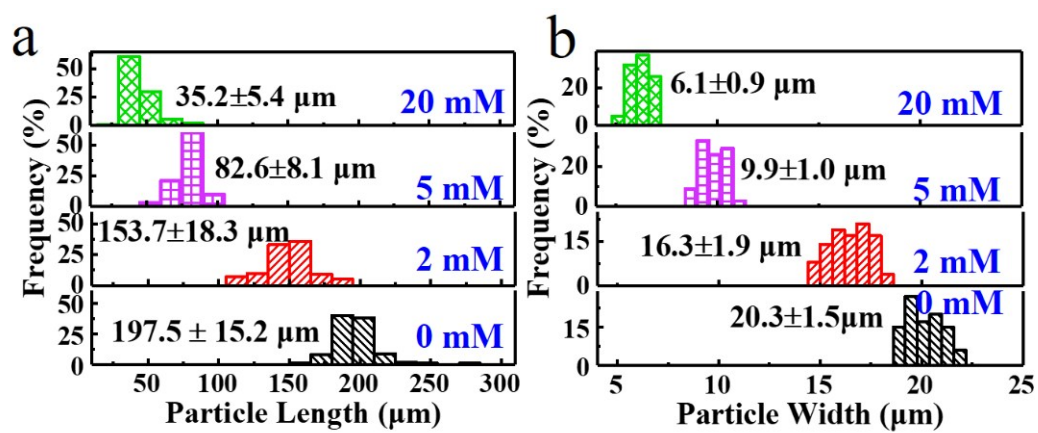

**Fig.S1** (a) Average lengths and (b) average widths of the DH crystals prepared at different  $\text{Cu}^{2+}$  concentrations solutions.

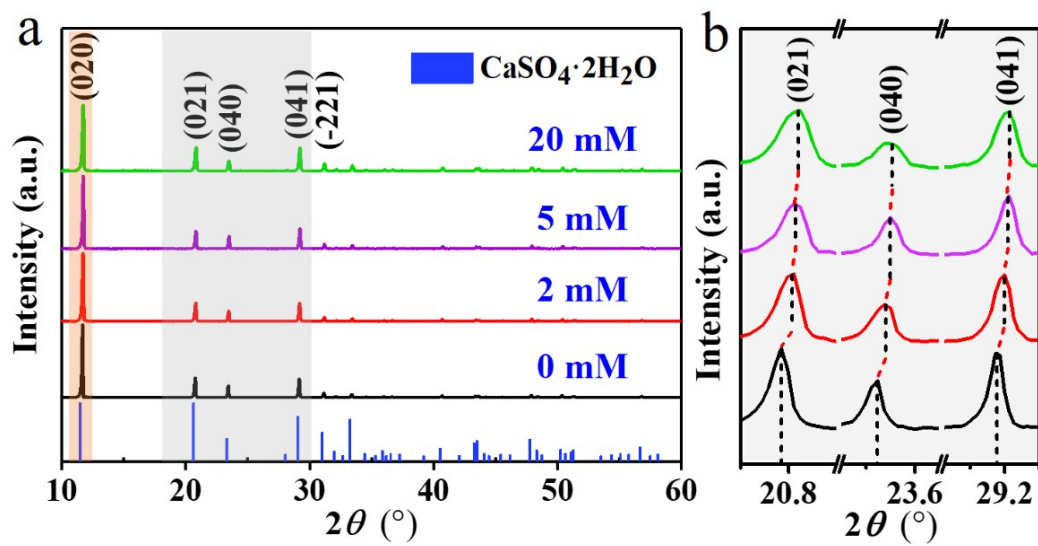

**Fig.S2** XRD patterns of  $\text{CaSO}_4 \cdot 2\text{H}_2\text{O}$  crystals prepared at different  $\text{Cu}^{2+}$  concentrations solutions.
